# Supplementary material for: Potential of Molecular Culture in Early Onset Neonatal Sepsis Diagnosis: A Proof of Principle Study
Source: MDPI journal article supplement (doi:10.3390/microorganisms11040960), 2023-04-07
Supplement: s1 [file s1]

## Supplemental Tables

Supplemental Table S1 Maternal risk factors for early-onset sepsis

| Maternal risk factors                                                                                                            | Red flag |
|----------------------------------------------------------------------------------------------------------------------------------|----------|
| Maternal parenteral antibiotic treatment with a suspicion of maternal sepsis during labor within 24 hours before or after birth. | Yes      |
| Suspected or confirmed infection in another baby in the case of a multiple pregnancy                                             | Yes      |
| Invasive group B streptococcal infection in a previous baby                                                                      | No       |
| maternal group B streptococcal colonisation, bacteriuria or infection in the current pregnancy                                   | No       |
| Prelabour rupture of membranes for more than 24 hours before the onset of labour in term born infants                            | No       |
| Rupture of membranes for more than 18 hours before a preterm birth                                                               | No       |
| Pre-term birth following spontaneous labour before 37 weeks' gestation                                                           | No       |
| Intrapartum maternal fever >38°C (regardless of epidural analgesia), or chorioamnionitis (suspected or proven)                   | No       |

Supplemental Table S2 Clinical signs and symptoms of early-onset sepsis

| Neonatal clinical symptoms                                                                         | Red flag |
|----------------------------------------------------------------------------------------------------|----------|
| Respiratory distress with onset more than four hours postpartum                                    | Yes      |
| Neonatal epileptic seizures                                                                        | Yes      |
| Need for mechanical ventilation                                                                    | Yes      |
| Signs of shock                                                                                     | Yes      |
| Altered behaviour or responsiveness                                                                | No       |
| Feeding difficulties (for example, feed refusal)                                                   | No       |
| Apnoea and/or bradycardia                                                                          | No       |
| Signs of respiratory distress (including grunting, recession, tachypnoea)                          | No       |
| Hypoxia (for example, central cyanosis or reduced oxygen saturation level)                         | No       |
| Signs of neonatal encephalopathy                                                                   | No       |
| Need for cardiopulmonary resuscitation                                                             | No       |
| Persistent pulmonary hypertension of newborns                                                      | No       |
| Temperature abnormality (lower than 36°C or higher than 38°C) unexplained by environmental factors | No       |
| Local signs of infection (for example, on the skin or eyes)                                        | No       |
